# Supplementary material for: Synthesis, characterization, and biological evaluation of hybrid copper(ii) complexes containing azole drugs and planar ligands against neglected diseases
Source: Royal Society of Chemistry journal article supplement (doi:10.1039/d3nj04608g), 2023-12-30
Supplement: d3nj04608g1.pdf [file d3nj04608g1.pdf]

**Synthesis, Characterization and Biological Evaluation  
of Hybrid Copper(II) Hybrid containing azole drugs and planar  
ligands: As prospective antileishmanial agents**

**Supplementary Materials**

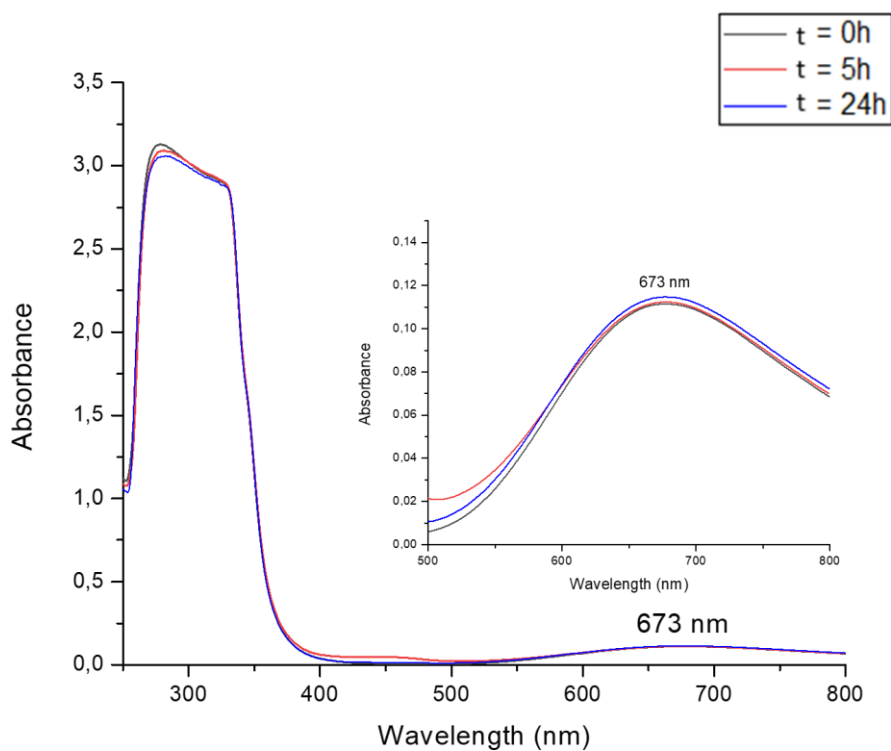

Figure S1: Absorption spectra of compounds 1 in the range of 250-800 nm recorded in DMSO in the interval of t = 0h to 24h.

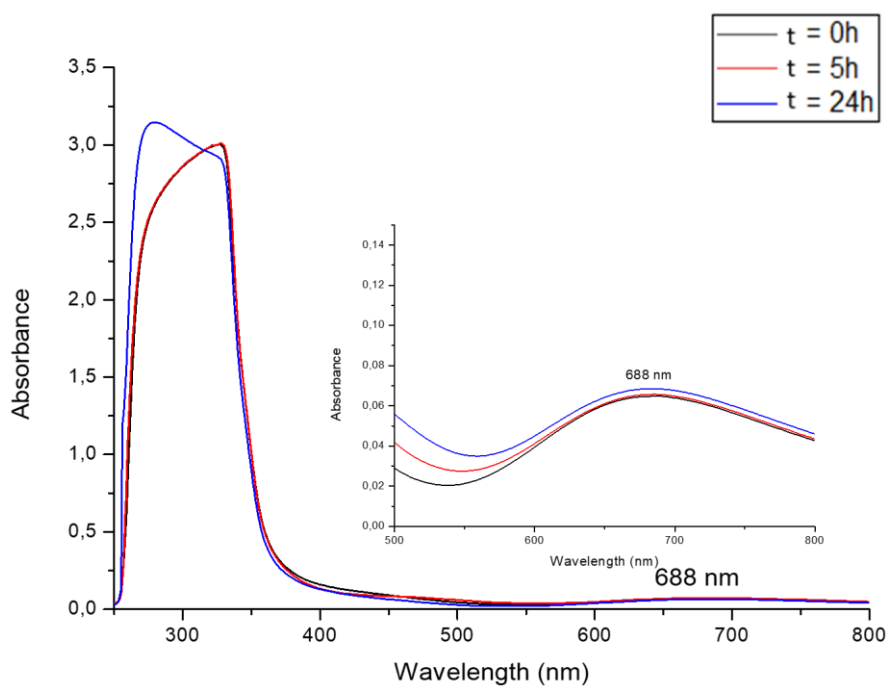

Figure S2: Absorption spectra of compound 2 in the range of 250-800 nm recorded in DMSO in the interval of  $t = 0\text{h}$  to 24h.

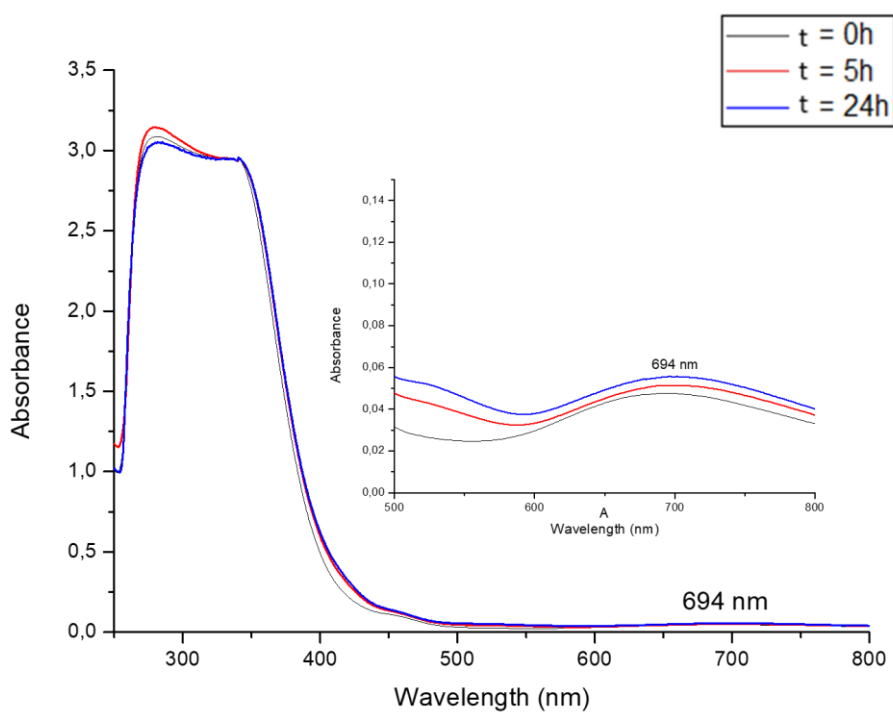

Figure S3: Absorption spectra of compound 3 in the range of 250-800 nm recorded in DMSO in the interval of  $t = 0\text{h}$  to 24h.

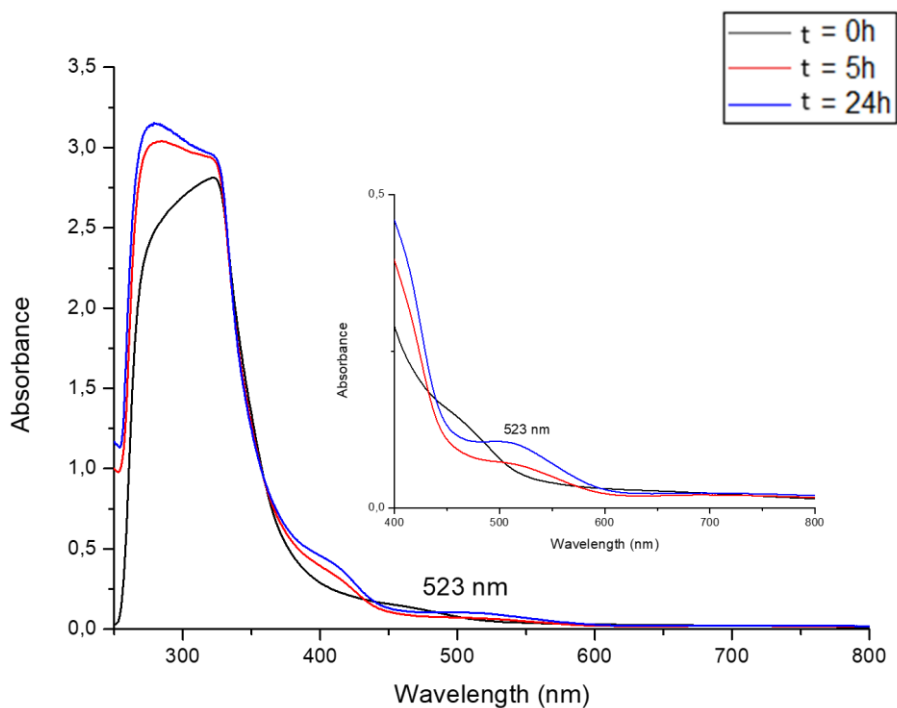

Figure S4: Absorption spectra of compound 4 in the range of 250-800 nm recorded in DMSO in the interval of  $t = 0\text{h}$  to 24h.

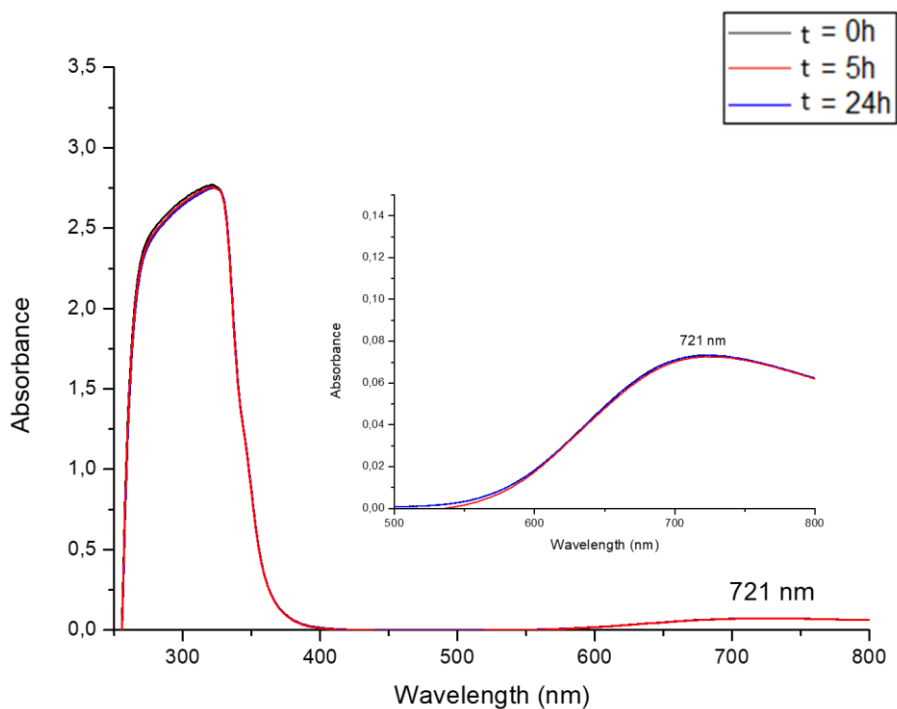

Figure S5: Absorption spectra of compound 5 in the range of 250-800 nm recorded in DMSO in the interval of  $t = 0\text{h}$  to 24h.

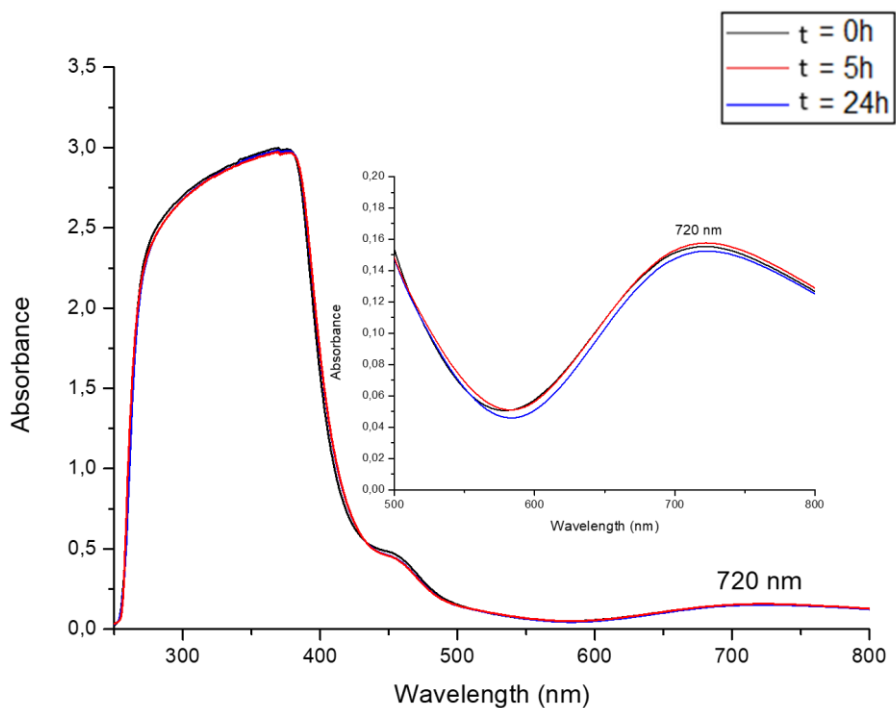

Figure S6: Absorption spectra of compound 6 in the range of 250-800 nm recorded in DMSO in the interval of  $t = 0\text{h}$  to 24h.

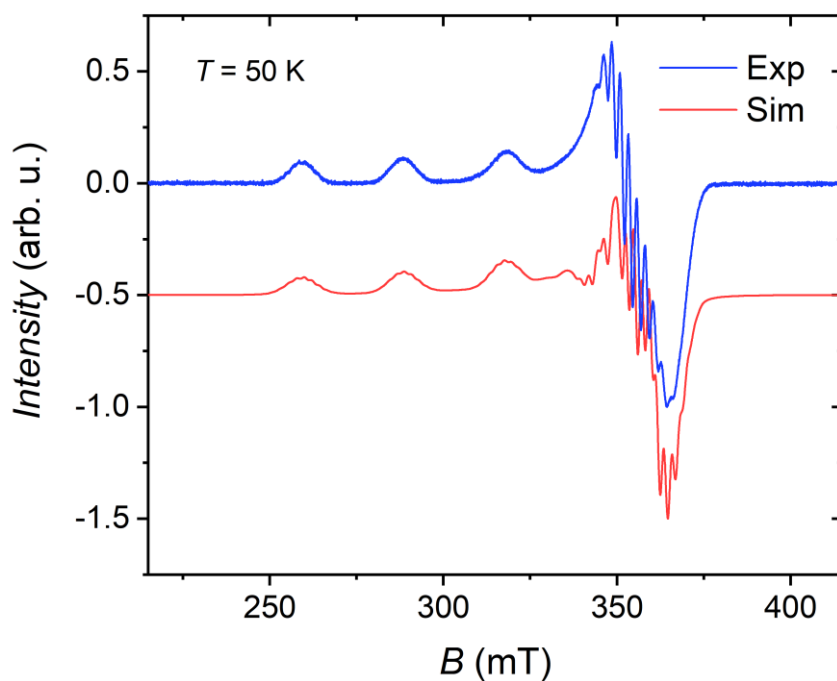

Figure S7. Experimental and simulated X-band CW EPR spectra obtained on a 0.5 mM frozen solution of **2** in DMF/EtOH 5:1.

**Table S1.** Best-fit parameters obtained from the simulation of X-band CW EPR measurement on a 0.5 mM frozen solution of **2** in DMF/EtOH 5:1.

|                                     | $g_x$    | $g_y$    | $g_z$    | $A_x$<br>(MHz) | $A_y$<br>(MHz) | $A_z$<br>(MHz) | $^N A_{iso}$<br>(MHz) |
|-------------------------------------|----------|----------|----------|----------------|----------------|----------------|-----------------------|
| <b>Cu</b>                           | 2.065(2) | 2.065(2) | 2.267(1) | 40(2)          | 40(2)          | 538(2)         |                       |
| <b>N<sub>1</sub>, N<sub>2</sub></b> |          |          |          |                |                |                | 41(1)                 |
| <b>N<sub>3</sub>, N<sub>4</sub></b> |          |          |          |                |                |                | 39(1)                 |
